# Supplementary material for: PI 3-Kinase and the Histone Methyl-Transferase KMT2D Collaborate to Induce Arp2/3-Dependent Migration of Mammary Epithelial Cells
Source: MDPI journal article supplement (doi:10.3390/cells13100876), 2024-05-19
Supplement: s1 [file s1]

**Supplementary Information**

**Figure S1.....2**

**Figure S2.....3**

**Figure S3.....4**

**Figure S4.....5**

**Figure S5.....6**

**Video legends.....7**

**Table S1.....8**

# *KMT2D* KO in parental MCF10A

## Sequencing

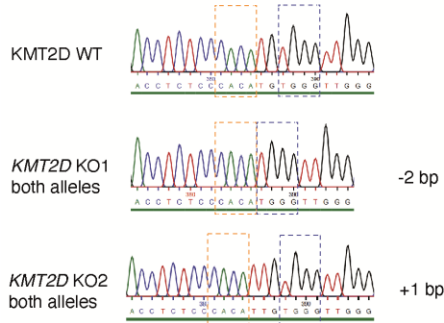

## Alignment

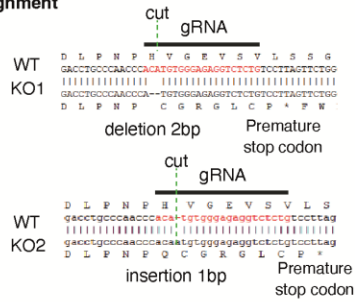

# *PIK3CA* H1047R results in increased PhosphoAKT1

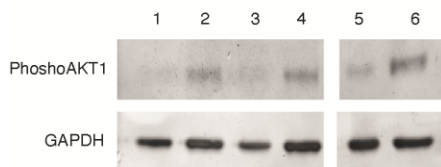

- 1 MCF10A
- 2 PI3KCA + H1047R (Horizon)
- 3 KMT2D KO
- 4 Double mutant
- 5 KMT2D KO (clone 2)
- 6 Double mutant (clone2)

# *PIK3CA* H1047R/+

## Sequencing

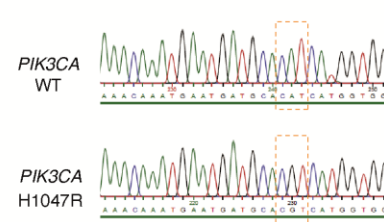

## Alignment

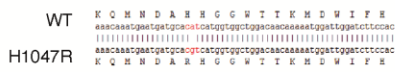

# *KMT2D* KO in *PIK3CA* H1047R/+

## Sequencing

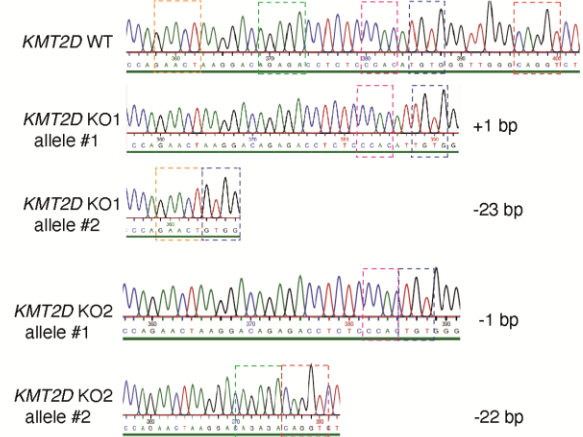

## Alignment

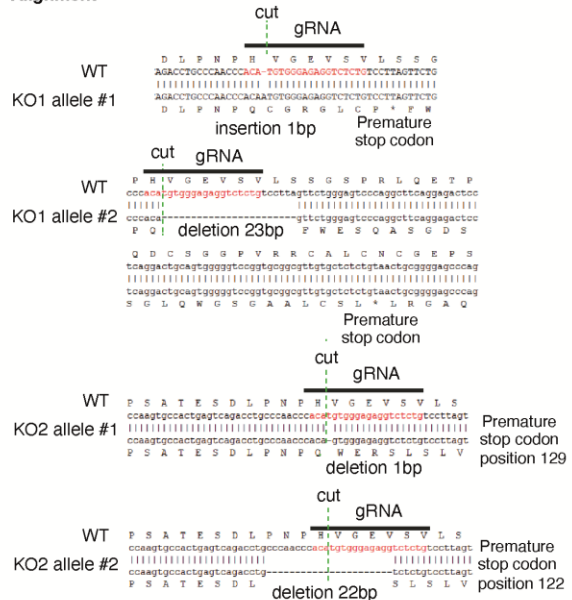

**Figure S1.** Characterization of *PIK3CA* H1047R and *KMT2D* KO alleles in the MCF10A cell lines. For the *KMT2D* KO, clones were selected based on the loss of the PciI restriction site (ACATGT) in the Cas9 cutting site and confirmed by sequencing when a frameshift results in the formation of a premature stop codon. Clones harboring *PIK3CA* H1047R displayed phosphorylated AKT1 on Ser 473, as expected upon constitutively active PI-3 kinase activity.

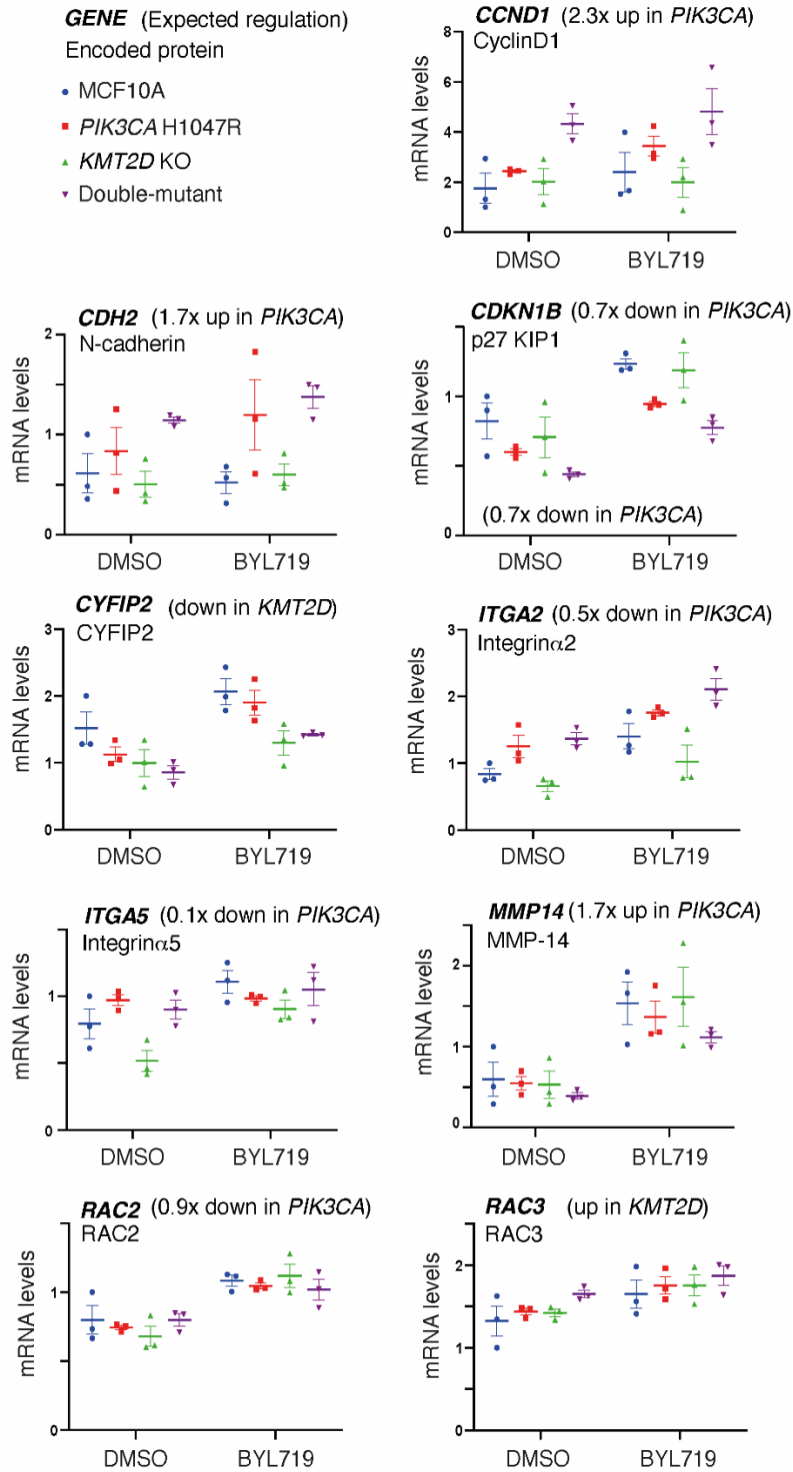

**Figure S2.** Genes, whose expression is measured and is not found to be significantly deregulated in MCF10A cells by *PIK3CA* H1047R or *KMT2D* inactivation. qRT-PCR analysis of gene expression is performed from MCF10A, *PIK3CA* H1047R, *KMT2D* KO and double-mutant cells in the presence or absence of 5  $\mu$ M BYL719. Mean  $\pm$  SEM, n=3 biological repeats. The variations that are previously reported in the references cited in the main text are indicated in parentheses.

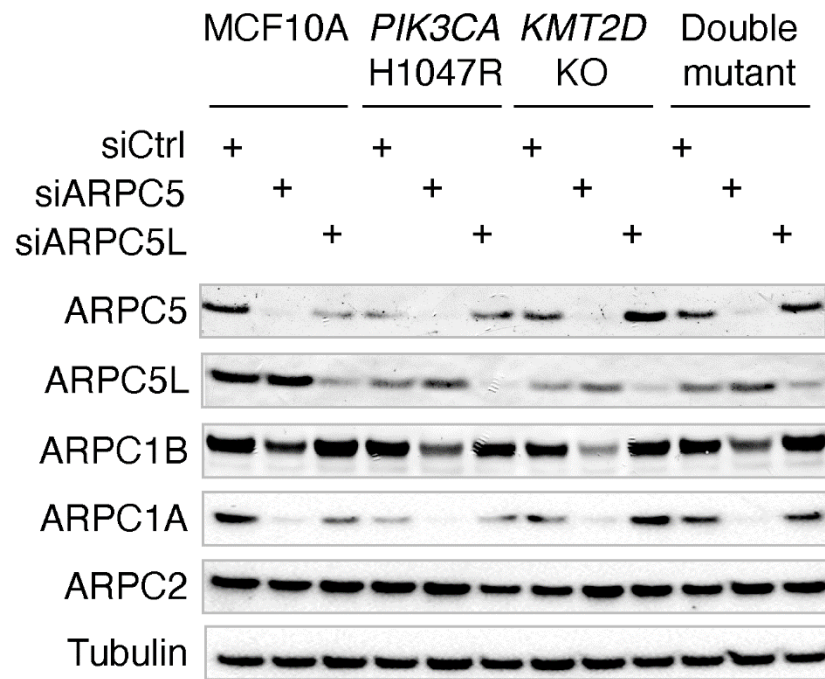

**Figure S3.** Western blots of MCF10A, *PIK3CA* H1047R, *KMT2D* KO and double-mutant cells when transfected with siRNAs targeting ARPC5 or ARPC5L or non-targeting siRNAs. The same depleted cells are assayed for single cell migration and results are displayed in Figure 6 and Figure S4.

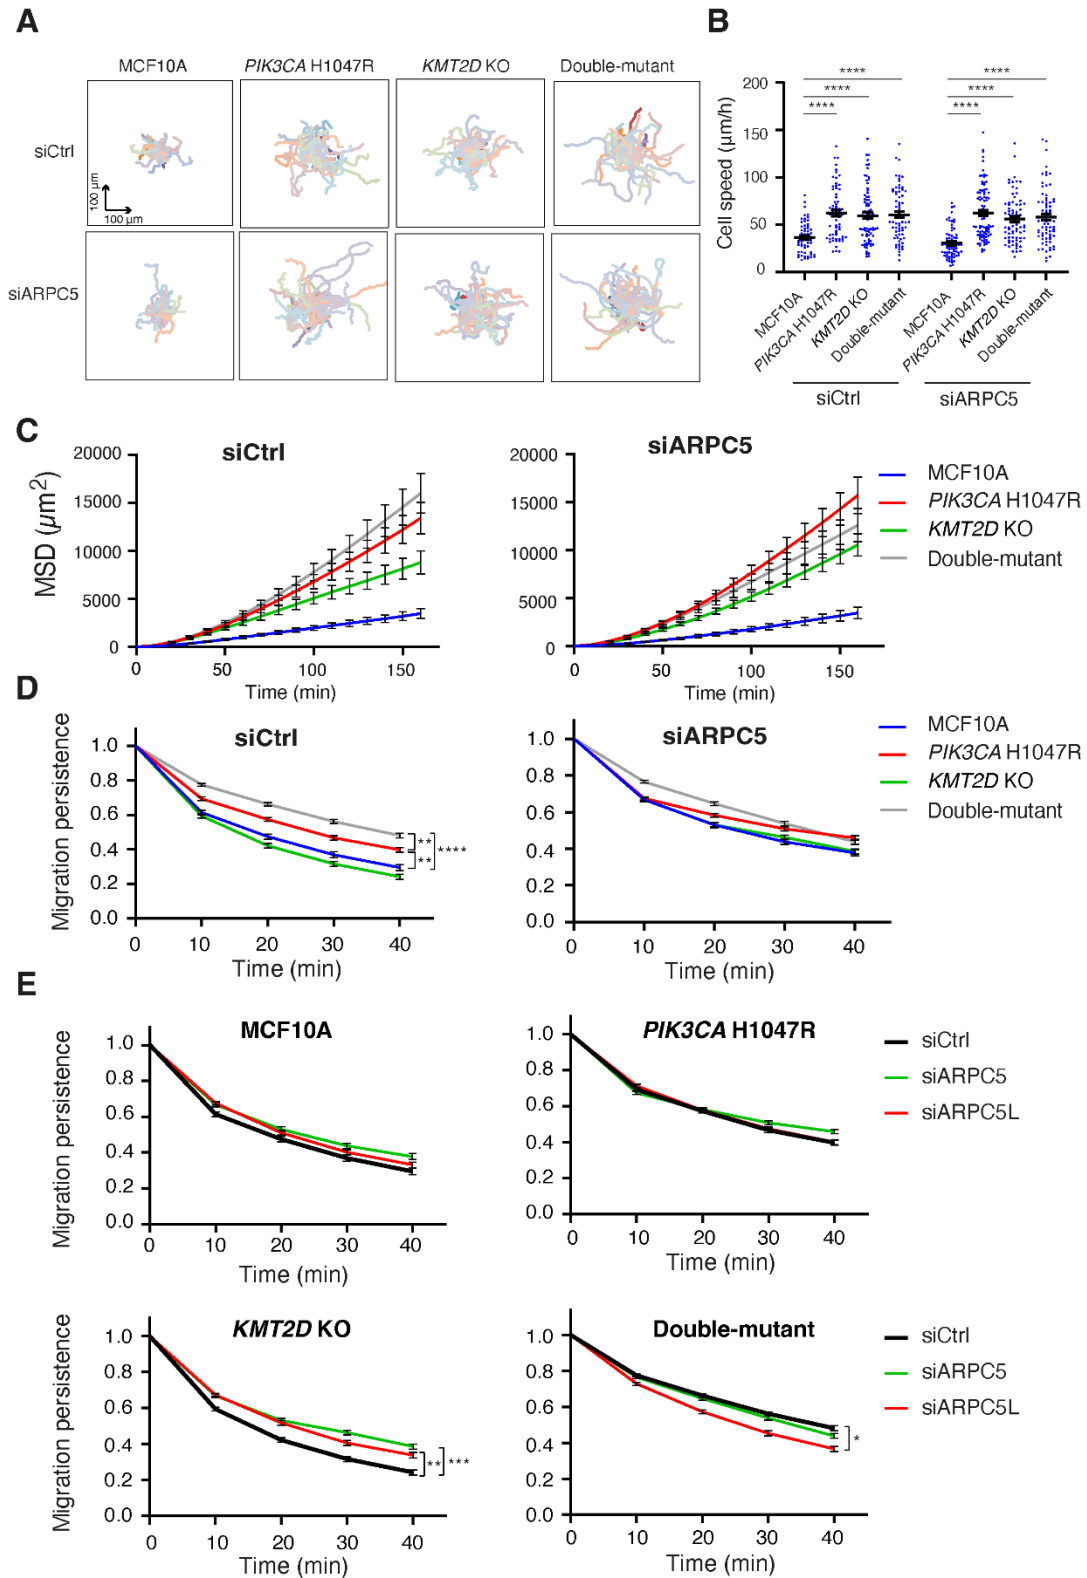

**Figure S4.** Single cell migration analysis. MCF10A, *PIK3CA* H1047R, *KMT2D* KO and double-mutant cells transfected with siRNAs targeting ARPC5 or ARPC5L or non-targeting siRNAs. **A** Trajectories of 56 MCF10A, *PIK3CA* H1047R, *KMT2D* KO and double-mutant cells, depleted of ARPC5 or not. The origin of each track is registered at the center of the plot. **B** Cell speed (mean  $\pm$  SEM). **C** Mean Square Displacement (MSD). **D** Migration persistence. **E** Migration persistence in all cell lines when depleted of either ARPC5 or ARPC5L. Three independent experiments are performed, overall number of cells ranges from 56 to 78 for each condition. \*\*  $p < 0.01$ , \*\*\*\*  $p < 0.0001$  (1-way ANOVA on non linear mixed-effect models for each condition). This supplementary figure displays additional results from the same experiment whose main results are displayed in Figure 6.

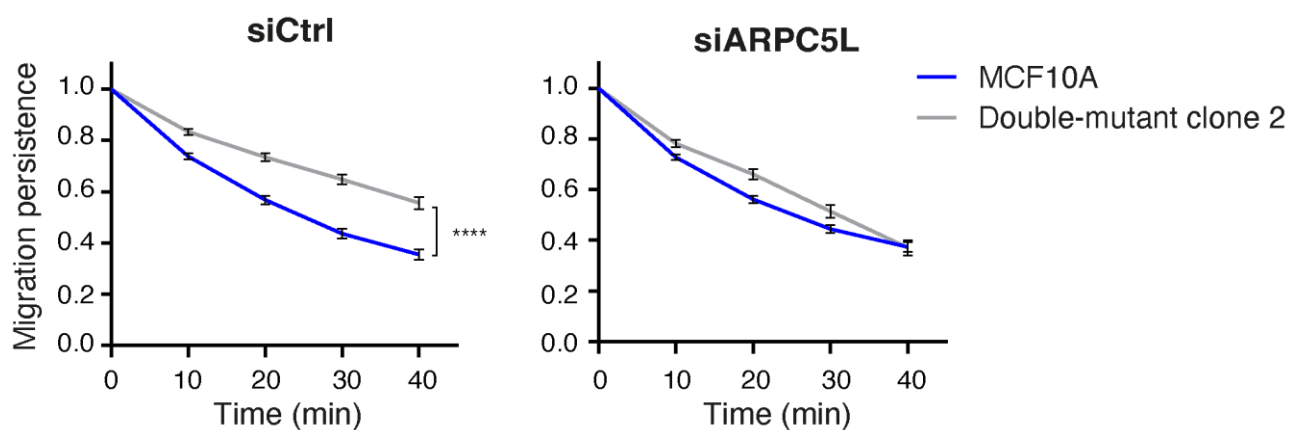

**Figure S5. Confirmation of the enhanced ARPC5L-dependent migration persistence of a second double-mutant.** MCF10A and double-mutant clone 2 were transfected with siRNA targeting ARPC5L or non-targeting siRNAs and analyzed for single cell migration. The overall number of cells analyzed ranges from 46 to 22 for each condition. \*\*\*\*  $p < 0.0001$  (1-way ANOVA on non linear mixed-effect models for each condition).

## Video legends

**Video S1.** Collective migration of parental MCF10A cells is observed using phase contrast microscopy in the presence of 5  $\mu$ M BYL719 or not. Displacement vectors obtained using Particle Image Velocimetry are overlaid in green.

**Video S2.** Collective migration of *PIK3CA* H1047R cells is observed using phase contrast microscopy in the presence of 5  $\mu$ M BYL719 or not. Displacement vectors obtained using Particle Image Velocimetry are overlaid in green.

**Video S3.** Collective migration of *KMT2D* KO cells is observed using phase contrast microscopy in the presence of 5  $\mu$ M BYL719 or not. Displacement vectors obtained using Particle Image Velocimetry are overlaid in green.

**Video S4.** Collective migration of double-mutant cells is observed using phase contrast microscopy in the presence of 5  $\mu$ M BYL719 or not. Displacement vectors obtained using Particle Image Velocimetry are overlaid in green.

**Video S5.** Single cell migration of parental, *PIK3CA* H1047R, *KMT2D* KO or double-mutant cell lines when depleted or not of ARPC5L.

**Table S1.** Primers used for qRT-PCR of genes described to be regulated by either *PIK3CA* H1047R or *KMT2D* mutations in breast cancer.

| Gene name     | Regulated by    | Primer forward           | Primer reverse            |
|---------------|-----------------|--------------------------|---------------------------|
| <i>CYFIP2</i> | KMT2D mut       | CCCACGTCATGGAGGTGTACTCT  | TAATTGTAGCGTGTGGCTCTCTCA  |
| <i>RAC3</i>   | KMT2D mut       | CGTGGGGAAGACATGCTTGCT    | GGCAGAGTAGTTGTCAAAAACGGTG |
| <i>CCND1</i>  | PI3KCA (H1047R) | GGATGCTGGAGGTCTGCGA      | AGAGGCCACGAACATGCAAG      |
| <i>CDKN1B</i> | PI3KCA (H1047R) | GAGGGATCAAAGCCTGGAACAT   | CGATTCTGTACCTCAACATCCCAT  |
| <i>PLAUR</i>  | PI3KCA (H1047R) | ACGGGGTTAGCGGAGCAAT      | TGTTTTGAGTAGAAGAATCGTCGGT |
| <i>MMP14</i>  | PI3KCA (H1047R) | ACACCTGCGTCCCAGCCTCT     | CGCACTCTTCCACACGGCA       |
| <i>ITGA2</i>  | PI3KCA (H1047R) | CAACATTGGAGGAGACACCCACT  | CCAGGAAGATGTCATTTCCATTCA  |
| <i>ITGA3</i>  | PI3KCA (H1047R) | AGGTGCCTGCAGAAGAATATGGT  | GACAACATCAGAGGGCTCCTGTAT  |
| <i>ITGA5</i>  | PI3KCA (H1047R) | ACCCTGCCGCTCAGATTTC      | ACCTAAAACCACACGGCCAGTCT   |
| <i>ARPC5L</i> | PI3KCA (H1047R) | CATGCAGCCTTGCGGAACCTCT   | CCCTGGGCTCGCTCCTTCA       |
| <i>RAC2</i>   | PI3KCA (H1047R) | TGGCCAAGGAGATTGACTCGGT   | GGCCTCTCTGGGTGAGAGCTGA    |
| <i>VIM</i>    | PI3KCA (H1047R) | TCAGACAGGATGTTGACAATGCGT | CTGCAGCTCCTGGATTTCCTCTT   |
| <i>ZEB1</i>   | PI3KCA (H1047R) | ACAGTGTTACCAGGGAGGAGCAGT | TTTCTTGCCCTTCCTTTCTGTCAT  |
