# Supplementary material for: PI 3-Kinase and the Histone Methyl-Transferase KMT2D Collaborate to Induce Arp2/3-Dependent Migration of Mammary Epithelial Cells
Source: Cells. 2024 May 19;13(10):876. doi: 10.3390/cells13100876 (PMC11119607; doi:10.3390/cells13100876)
Supplement: Supplementary file 1 [file cells-13-00876-s001.zip]

Archive with 7 entries (7 files):
- cells-2894110-supplementary.pdf
- Table S2 Statistics.xlsx
- Video S1.avi
- Video S2.avi
- Video S3.avi
- Video S4.avi
- video S5.avi
